# Supplementary material
Source: PubMed Central journal article supplement (PMC3093937)

Supplementary Fig. 1

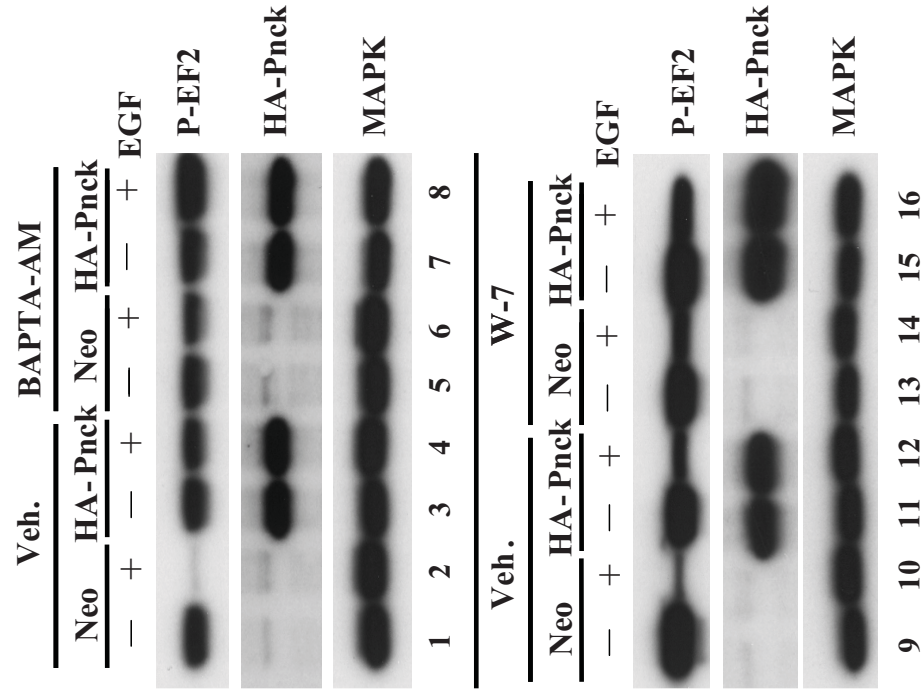

# Supplementary Fig. 2

A.

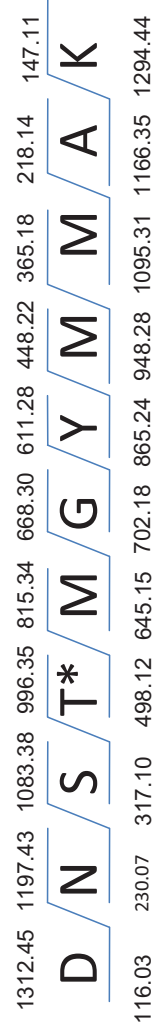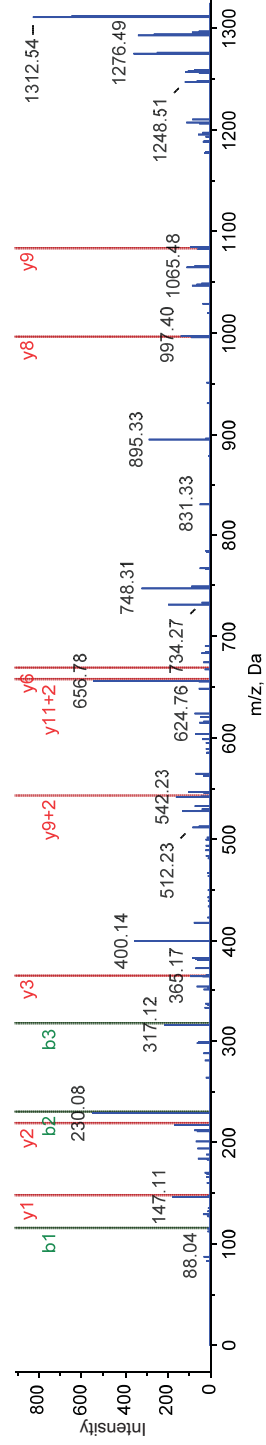

# Supplementary Fig. 2

B.

|         |         |         |         |        |        |        |        |        |        |        |        |        |
|---------|---------|---------|---------|--------|--------|--------|--------|--------|--------|--------|--------|--------|
| 1381.69 | 1280.64 | 1167.56 | 1066.51 | 953.43 | 854.36 | 739.33 | 558.32 | 501.30 | 388.21 | 331.19 | 248.16 | 147.11 |
| T       | L       | T       | L       | V      | D      | T*     | G      | I      | G      | M      | T      | K      |

|        |        |        |        |        |        |        |        |        |         |         |         |         |
|--------|--------|--------|--------|--------|--------|--------|--------|--------|---------|---------|---------|---------|
| 102.05 | 215.13 | 316.18 | 429.27 | 528.33 | 643.36 | 824.38 | 881.40 | 994.48 | 1051.50 | 1134.54 | 1235.59 | 1363.68 |
|--------|--------|--------|--------|--------|--------|--------|--------|--------|---------|---------|---------|---------|

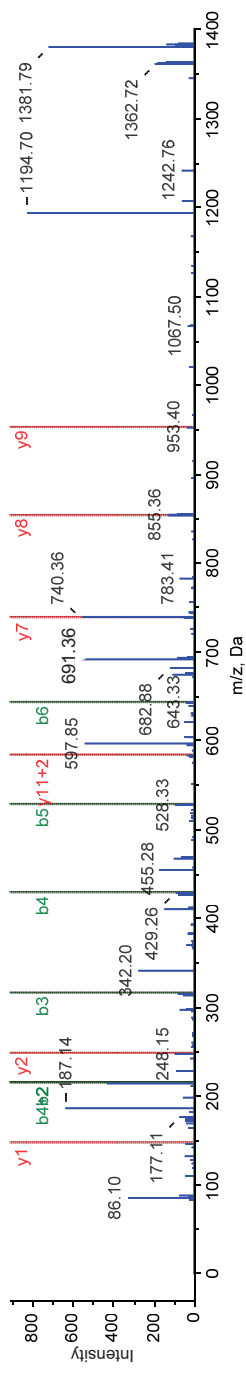

# Supplementary Fig. 2

C.

|         |         |         |         |         |        |        |        |        |        |        |        |        |   |
|---------|---------|---------|---------|---------|--------|--------|--------|--------|--------|--------|--------|--------|---|
| 1566.74 | 1467.67 | 1368.60 | 1237.58 | 1070.58 | 941.54 | 826.51 | 699.41 | 602.36 | 489.27 | 375.23 | 262.15 | 175.11 |   |
| V       | V       | V       | D       | S*      | E      | D      | L      | P      | L      | N      | I      | S      | R |

|        |        |        |        |        |        |        |        |         |         |         |         |         |
|--------|--------|--------|--------|--------|--------|--------|--------|---------|---------|---------|---------|---------|
| 100.07 | 199.14 | 330.16 | 497.16 | 626.20 | 741.23 | 868.33 | 965.38 | 1078.47 | 1192.51 | 1305.59 | 1392.62 | 1548.73 |
|--------|--------|--------|--------|--------|--------|--------|--------|---------|---------|---------|---------|---------|

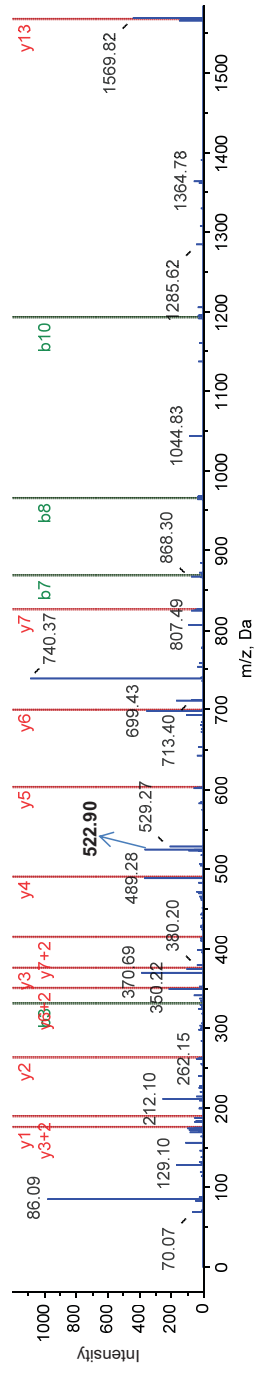

### Supplementary Figure 3

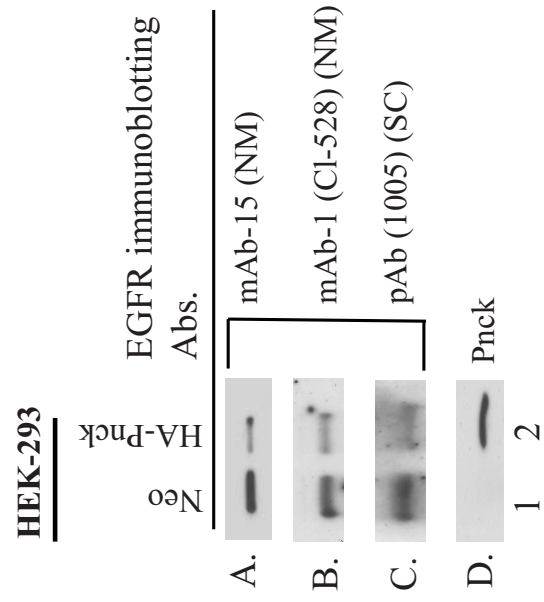

Supplement: supp_00167.2010_figs1-3.pdf [file supp_00167.2010_figs1-3.pdf]
